# Supplementary material for: A Multi-Center Study Investigating Long COVID-19 in Healthcare Workers from North-Eastern Italy: Prevalence, Risk Factors and the Impact of Pre-Existing Humoral Immunity—ORCHESTRA Project
Source: MDPI journal article supplement (doi:10.3390/vaccines11121769), 2023-11-27
Supplement: s1 [file s1]

**Supplementary Table S1.** Socio-demographic profile of respondents by research centre. Number (N) and column percentage (%).

| TERM             | STRATA                       | VERONA<br>(N=2.996) | PADUA<br>(N=1,206) | TRIESTE<br>(N=983) | MODENA-<br>REGGIO EMILIA<br>(N=247) |
|------------------|------------------------------|---------------------|--------------------|--------------------|-------------------------------------|
| Sex              | Males                        | 716 (23.9)          | 227 (18.8)         | 271 (27.6)         | 96 (38.9)                           |
|                  | Females                      | 2,280 (76.1)        | 979 (81.2)         | 712 (72.4)         | 151 (61.1)                          |
| Age              | <40                          | 932 (38.4)          | 307 (26.1)         | 262 (32.7)         | 215 (98.2)                          |
|                  | 40-54                        | 845 (34.8)          | 472 (41.0)         | 35 (41.8)          | 3 (1.4)                             |
|                  | 55+                          | 653 (26.9)          | 373 (32.4)         | 204 (25.5)         | 1 (0.5)                             |
| Country of birth | Italy                        | 2,865 (96.4)        | 1,161 (96.4)       | 923 (94.3)         | 236 (95.9)                          |
|                  | Other EU country             | 57 (1.9)            | 24 (2.0)           | 21 (2.2)           | 4 (1.6)                             |
|                  | Extra-EU country             | 49 (1.7)            | 19 (1.6)           | 35 (3.6)           | 6 (2.4)                             |
| Ethnicity        | Caucasian                    | 2,421 (90.3)        | 848 (88.4)         | 791 (88.4)         | 235 (95.9)                          |
|                  | Non-Caucasian                | 260 (9.7)           | 160 (15.9)         | 104 (11.6)         | 10 (4.1)                            |
| Education        | Junior secondary             | 176 (6.1)           | 101 (8.6)          | 49 (5.1)           | 0                                   |
|                  | Secondary                    | 932 (32.2)          | 349 (29.8)         | 231 (24.0)         | 0                                   |
|                  | University                   | 1,165 (40.2)        | 492 (42.0)         | 384 (39.9)         | 201 (81.7)                          |
|                  | Postgraduate                 | 626 (21.6)          | 229 (19.6)         | 299 (31.1)         | 45 (18.3)                           |
| Marital status   | Single                       | 951 (32.7)          | 281 (24.0)         | 254 (26.3)         | 150 (62.5)                          |
|                  | Married                      | 1,379 (47.5)        | 623 (53.3)         | 434 (44.9)         | 30 (12.5)                           |
|                  | Cohabitant                   | 363 (12.5)          | 144 (12.3)         | 146 (15.1)         | 58 (24.2)                           |
|                  | Divorced / separated / widow | 213 (7.3)           | 121 (10.4)         | 133 (13.8)         | 2 (0.8)                             |
| Job task         | Medical consultant           | 330 (11.2)          | 159 (13.2)         | 186 (19.1)         | 6 (2.5)                             |
|                  | Medical trainee              | 233 (7.9)           | 53 (4.4)           | 16 (1.6)           | 234 (95.5)                          |
|                  | Nurse                        | 958 (32.4)          | 583 (48.5)         | 348 (35.7)         | 0                                   |
|                  | Laboratorist                 | 108 (3.7)           | 35 (2.9)           | 15 (1.5)           | 0                                   |
|                  | Nurse aid                    | 277 (9.4)           | 160 (13.3)         | 90 (9.2)           | 0                                   |
|                  | Administrative clerk         | 339 (11.5)          | 97 (8.1)           | 83 (8.5)           | 0                                   |
|                  | Health technician            | 146 (4.9)           | 53 (4.4)           | 64 (6.6)           | 0                                   |
|                  | Midwife                      | 25 (0.9)            | 7 (0.6)            | 12 (1.2)           | 0                                   |
|                  | Pharmacist                   | 17 (0.6)            | 6 (0.5)            | 8 (0.8)            | 3 (1.2)                             |
|                  | Psychologist                 | 15 (0.5)            | 8 (0.7)            | 30 (3.1)           | 0                                   |
|                  | Physio-therapist             | 47 (1.6)            | 8 (0.7)            | 49 (5.0)           | 0                                   |
|                  | Undergraduate student        | 228 (7.7)           | 0                  | 0                  | 0                                   |
|                  | Other                        | 235 (7.9)           | 33 (2.8)           | 73 (7.5)           | 2 (0.8)                             |

| Supplementary Table S2. Number of doses of COVID-19 vaccine over time received by the study population (N=5,432). |         |        |         |         |         |
|-------------------------------------------------------------------------------------------------------------------|---------|--------|---------|---------|---------|
| DATE                                                                                                              | 0 doses | 1 dose | 2 doses | 3 doses | 4 doses |
| 1 Jan 2021                                                                                                        | 4439    | 656    | 337     | 0       | 0       |
| 15 Jan 2021                                                                                                       | 3498    | 1603   | 331     | 0       | 0       |
| 1 Feb 2021                                                                                                        | 2874    | 1003   | 1555    | 0       | 0       |
| 14 Feb 2021                                                                                                       | 2633    | 1122   | 1677    | 0       | 0       |
| 1 Mar 2021                                                                                                        | 1705    | 907    | 2820    | 0       | 0       |
| 15 Mar 2021                                                                                                       | 1657    | 859    | 2916    | 0       | 0       |
| 1 Apr 2021                                                                                                        | 1507    | 825    | 3100    | 0       | 0       |
| 15 Apr 2021                                                                                                       | 1470    | 836    | 3126    | 0       | 0       |
| 1 May 2021                                                                                                        | 1507    | 825    | 3100    | 0       | 0       |
| 15 May 2021                                                                                                       | 1470    | 836    | 3126    | 0       | 0       |
| 1 Jun 2021                                                                                                        | 1398    | 775    | 3259    | 0       | 0       |
| 15 Jun 2021                                                                                                       | 1380    | 772    | 3280    | 0       | 0       |
| 1 Jul 2021                                                                                                        | 1338    | 725    | 3369    | 0       | 0       |
| 15 Jul 2021                                                                                                       | 1334    | 721    | 3377    | 0       | 0       |
| 1 Aug 2021                                                                                                        | 1317    | 695    | 3410    | 10      | 0       |
| 15 Aug 2021                                                                                                       | 1298    | 711    | 3413    | 10      | 0       |
| 1 Sep 2021                                                                                                        | 1293    | 666    | 3422    | 51      | 0       |
| 15 Sep 2021                                                                                                       | 1289    | 659    | 3428    | 56      | 0       |
| 1 Oct 2021                                                                                                        | 1141    | 600    | 3258    | 433     | 0       |
| 15 Oct 2021                                                                                                       | 1229    | 583    | 3056    | 563     | 1       |
| 1 Nov 2021                                                                                                        | 1160    | 479    | 2219    | 1573    | 1       |
| 15 Nov 2021                                                                                                       | 1147    | 450    | 1886    | 1948    | 1       |
| 1 Dec 2021                                                                                                        | 1093    | 347    | 1123    | 2868    | 1       |
| 15 Dec 2021                                                                                                       | 1077    | 307    | 780     | 3267    | 1       |
| 1 Jan 2022                                                                                                        | 1064    | 272    | 631     | 3463    | 2       |
| 15 Jan 2022                                                                                                       | 1052    | 263    | 612     | 3502    | 3       |
| 1 Feb 2022                                                                                                        | 1047    | 245    | 571     | 3566    | 3       |
| 14Feb 2022                                                                                                        | 1046    | 241    | 567     | 3575    | 3       |
| 1 Mar 2022                                                                                                        | 1037    | 240    | 533     | 3618    | 4       |
| 15 Mar 2022                                                                                                       | 1037    | 234    | 526     | 3631    | 4       |
| 1 Apr 2022                                                                                                        | 1034    | 229    | 499     | 3664    | 6       |
| 15 Apr 2022                                                                                                       | 1035    | 224    | 497     | 3669    | 7       |
| 1 May 2022                                                                                                        | 1029    | 224    | 456     | 3715    | 8       |
| 15 May 2022                                                                                                       | 1028    | 224    | 451     | 3721    | 8       |
| 1 Jun 2022                                                                                                        | 1026    | 219    | 420     | 3758    | 9       |
| 15 Jun 2022                                                                                                       | 1025    | 217    | 417     | 3764    | 9       |
| 1 Jul 2022                                                                                                        | 1023    | 214    | 410     | 3775    | 10      |
| 15 Jul 2022                                                                                                       | 1022    | 212    | 410     | 3777    | 11      |
| 1 Aug 2022                                                                                                        | 1021    | 212    | 410     | 3777    | 12      |
| 15 Aug 2022                                                                                                       | 1021    | 212    | 410     | 3777    | 12      |
| 1 Sep 2022                                                                                                        | 1021    | 212    | 408     | 3779    | 12      |

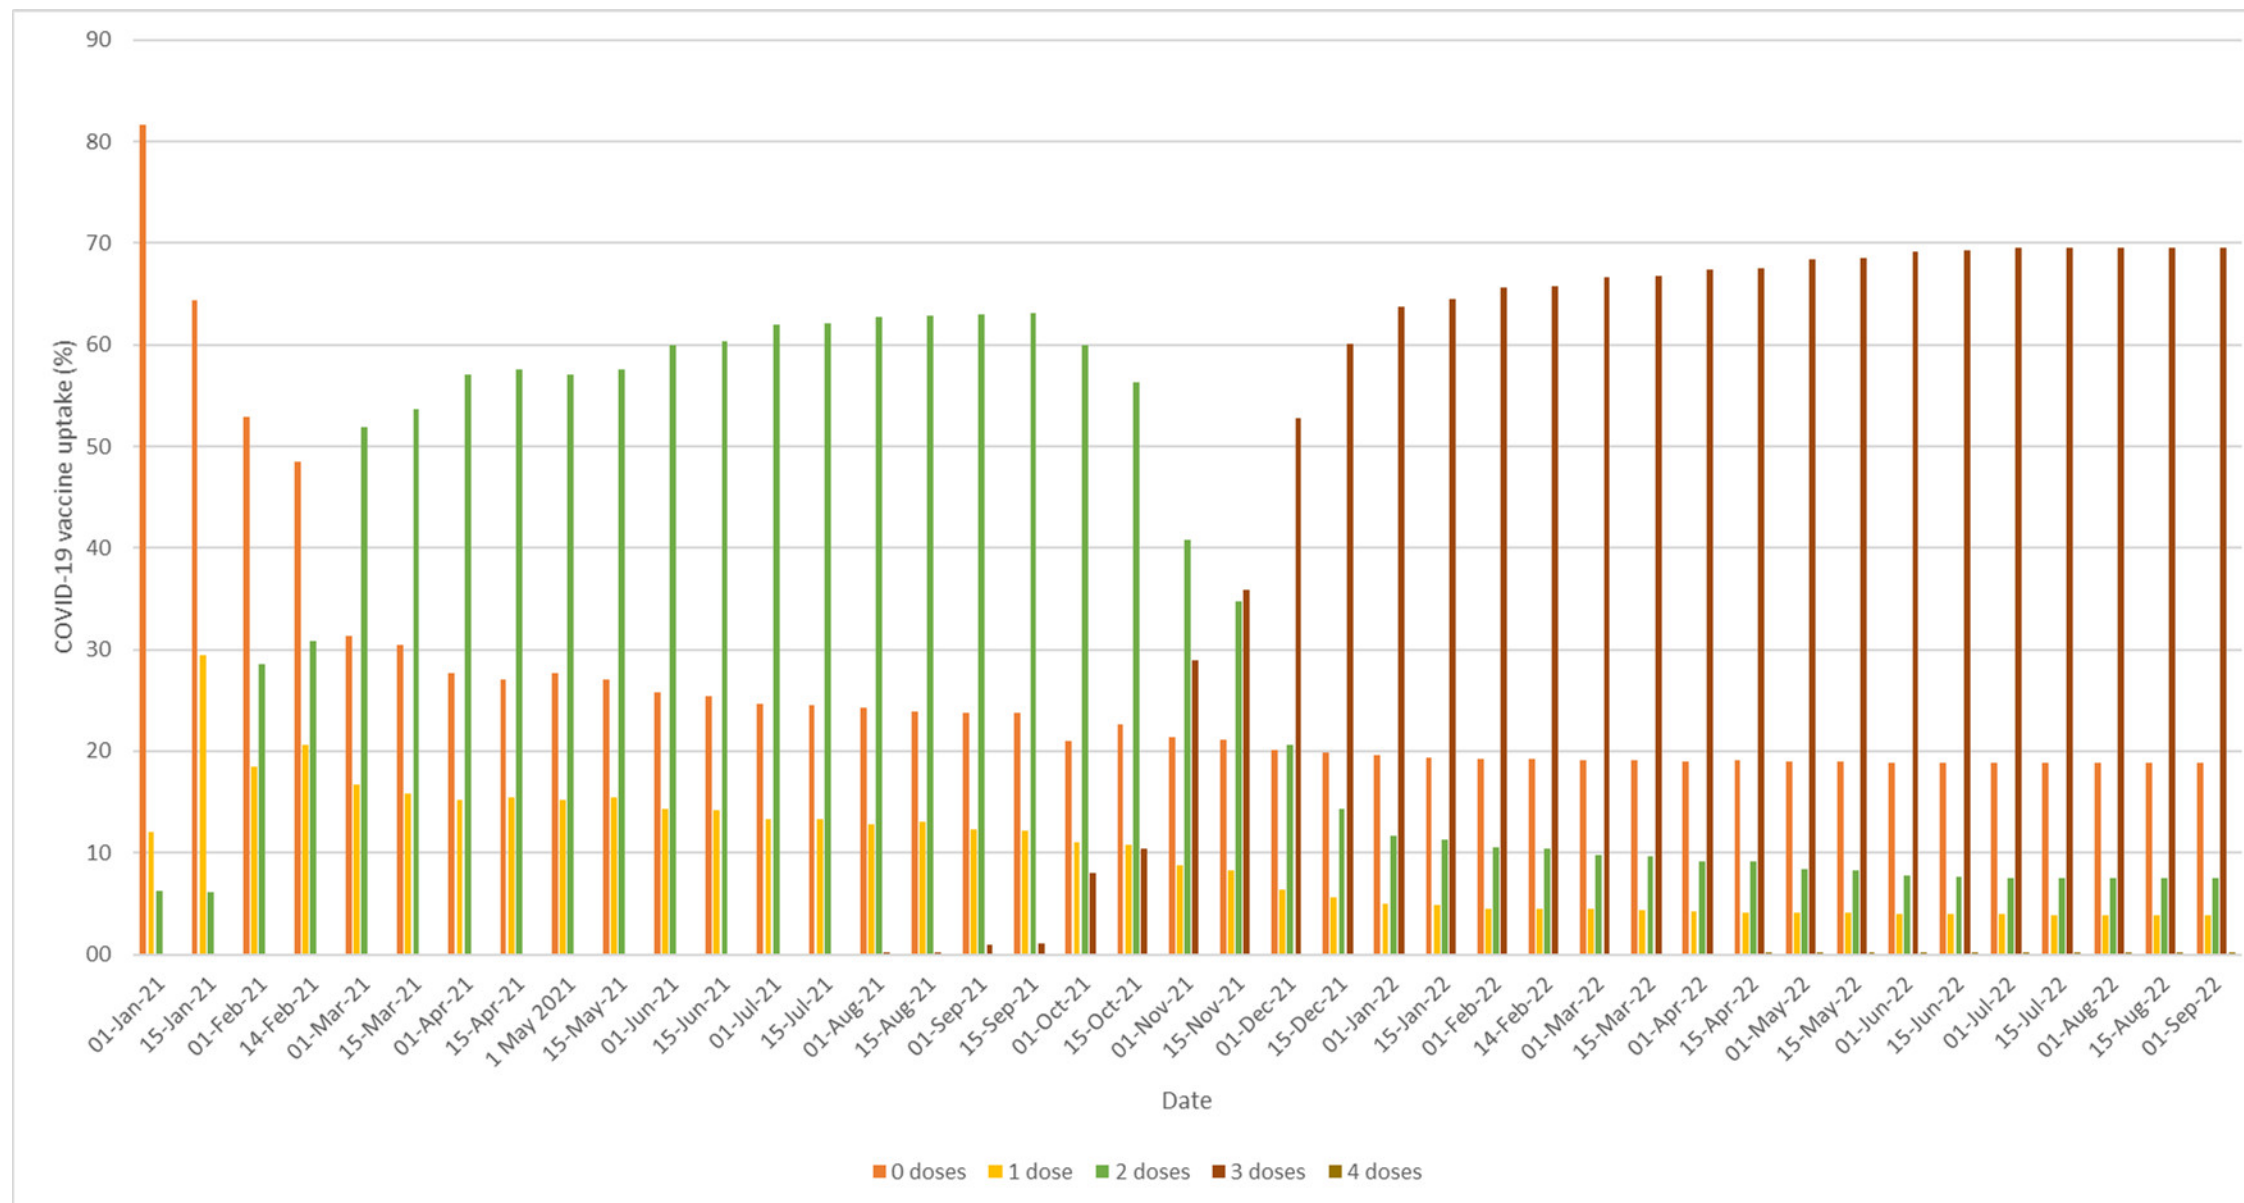

**Supplementary Figure S1.** COVID-19 vaccine uptake over time in health care workers from all four centres combined (N=5,432), by number of doses received.

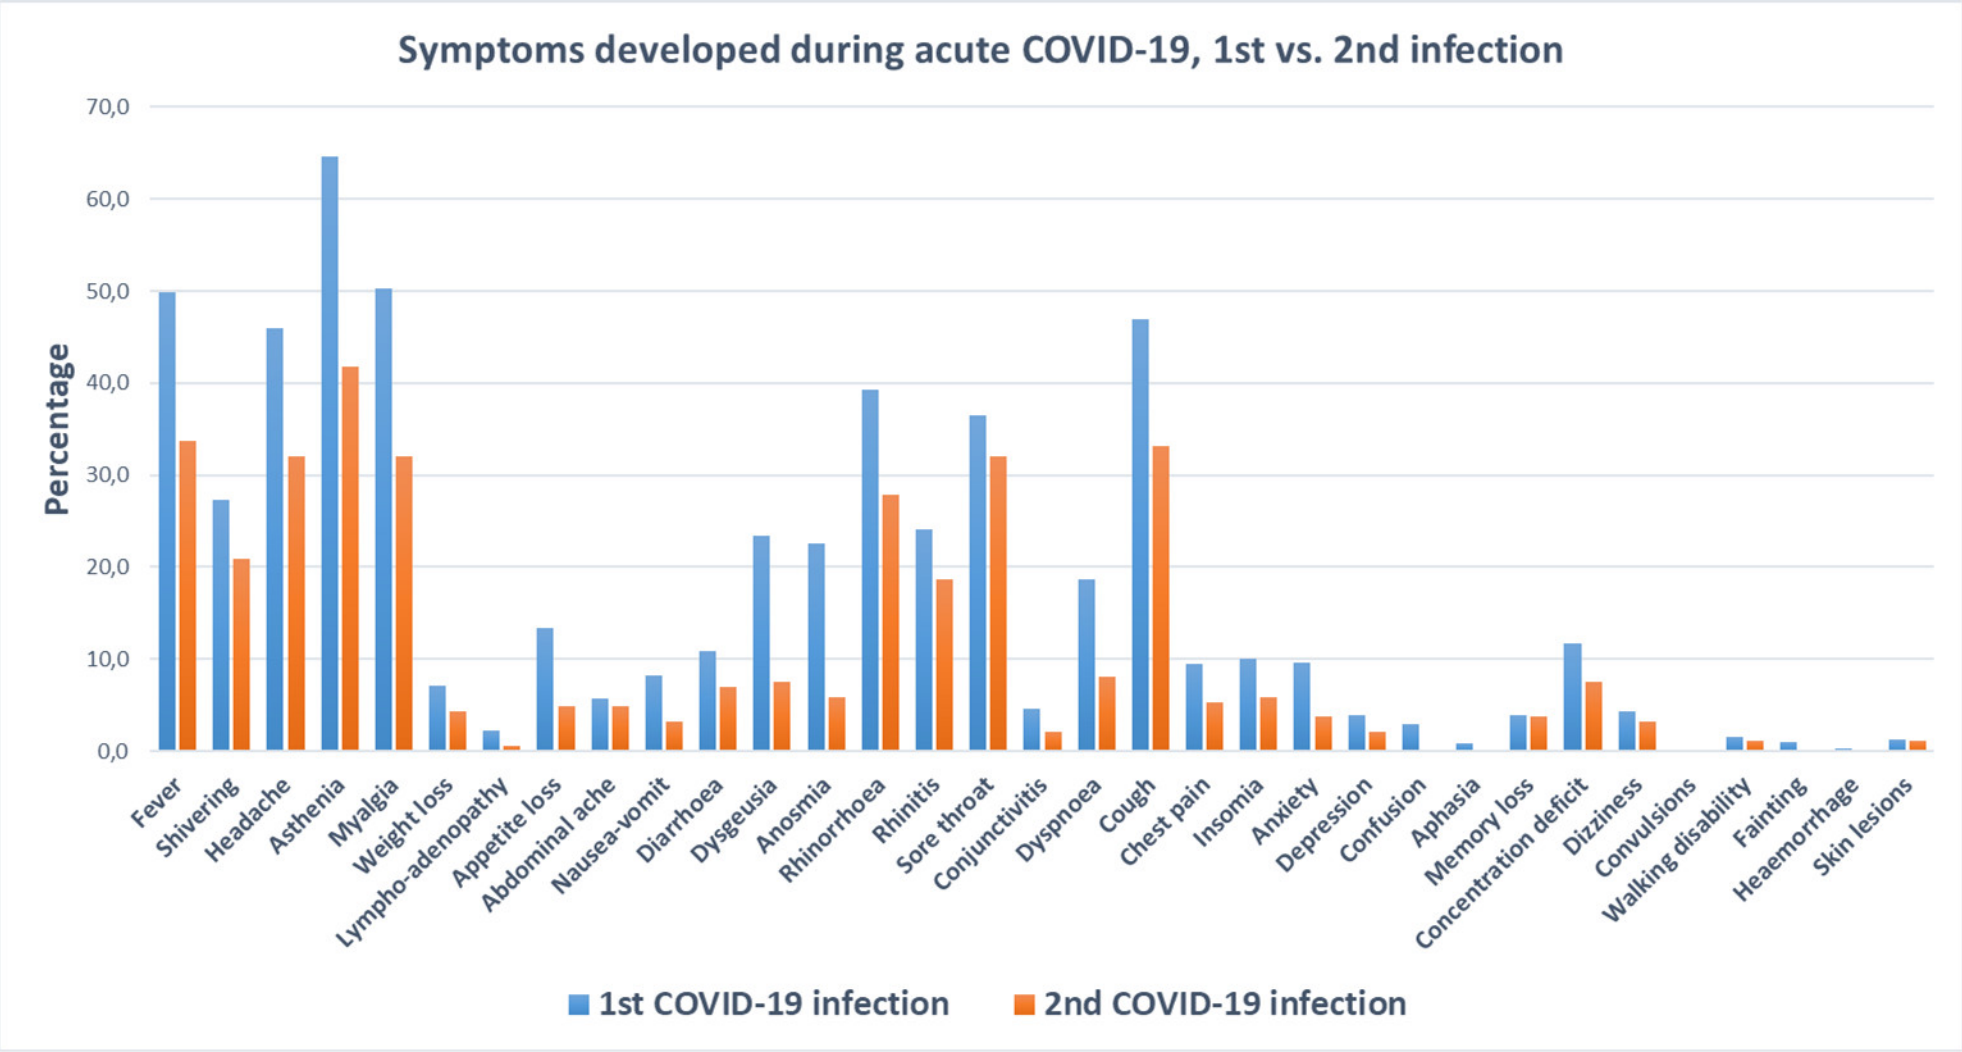

**Supplementary Figure S2.** Any symptoms reported by health care workers during acute COVID-19, primary versus second infection.

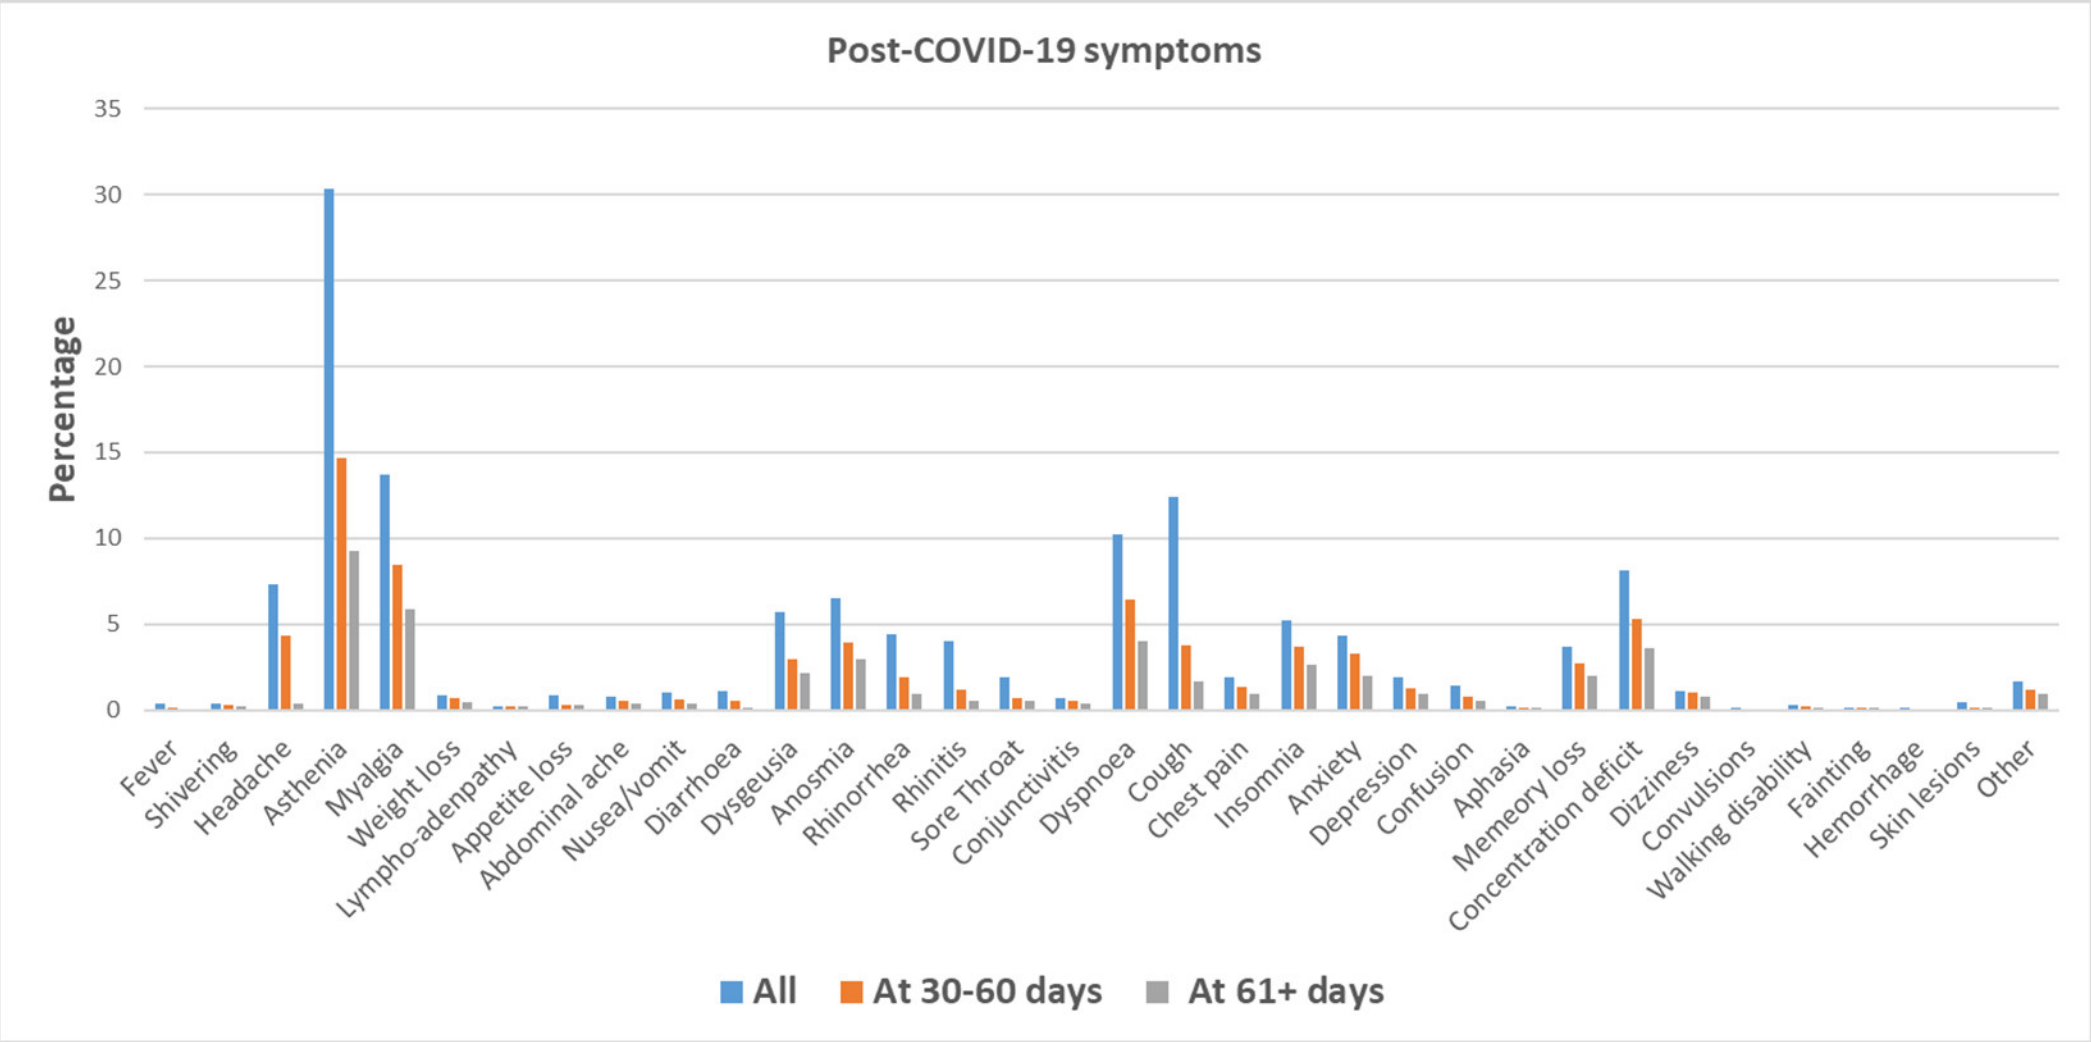

**Supplementary Figure S3.** Percentage of symptoms (persisting or novel) reported by health care workers (HCWs) after first negative swab for primary COVID-19 episode. Overall symptoms, at 30-60 days or 61+ days since first negative swab following primary COVID-19 infection

**Supplementary Table S3.** Distribution of symptoms in health care workers (HCWs). Symptoms during acute disease, all post-COVID-19 symptoms, persisting or newly developed at 30-60 or 61+ days since first negative swab (primary vs. second infection). Number (N) and column percentage (%). ENT= Ear-Nose-Throat. NA= Not applicable. Symptoms not available on 432 HCWs for 1<sup>st</sup> COVID-19 infection and on 51 HCWs for second COVID-19 episode. M=missing information on symptoms

| SYMPTOMS           |                   | STRATA | SYMPTOMS RELATED TO 1 <sup>st</sup> COVID-19 INFECTION (M=432)) |                   |                       |            |            |                     |            | SYMPTOMS RELATED TO 2 <sup>nd</sup> COVID-19 INFECTION (M=51) |                   |                      |            |           |
|--------------------|-------------------|--------|-----------------------------------------------------------------|-------------------|-----------------------|------------|------------|---------------------|------------|---------------------------------------------------------------|-------------------|----------------------|------------|-----------|
|                    |                   |        | ACUTE                                                           | All Post COVID-19 | At 30-60 days (N=576) |            |            | At 61+ days (N=389) |            | ACUTE                                                         | All Post COVID-19 | At 30-60 days (N=25) |            |           |
|                    |                   |        |                                                                 |                   | ALL                   | PERSISTING | NOVEL      | PERSISTING          | NOVEL      |                                                               |                   | ALL                  | PERSISTING | NOVEL     |
| GENERAL INFECTIOUS | Fever             | No     | 987 (50.1)                                                      | 1,961 (99.6)      | 453 (99.6)            | 289 (99.3) | 164 (100)  | 189 (99.5)          | 108 (100)  | 124 (66.3)                                                    | 187 (100)         | 19 (100)             | 6 (100)    | 13 (100)  |
|                    |                   | Yes    | 982 (49.9)                                                      | 8 (0.4)           | 2 (0.4)               | 2 (0.7)    | 0          | 1 (0.5)             | 0          | 63 (26.5)                                                     | 0                 | 0                    | 0          | 0         |
|                    | Shivering         | No     | 1,431 (72.7)                                                    | 1,862 (99.6)      | 449 (98.7)            | 164 (96.5) | 285(100)   | 115 (95.8)          | 178 (100)  | 148 (79.1)                                                    | 146 (78.1)        | 5 (26.3)             | 1 (25.0)   | 4 (26.7)  |
|                    |                   | Yes    | 538 (27.3)                                                      | 7 (0.4)           | 6 (1.3)               | 6 (3.5)    | 0          | 5                   | 0          | 39 (20.9)                                                     | 41 (21.9)         | 14 (73.7)            | 3 75.0)    | 11 (73.3) |
|                    | Headache          | No     | 1,064 (54.0)                                                    | 1,826 (92.7)      | 370 (81.4)            | 210 (72.7) | 160 (96.4) | 142 (73.6)          | 102 (97.1) | 127 (67.9)                                                    | 182 (97.3)        | 17 (89.5)            | 7 (77.8)   | 10 (100)  |
|                    |                   | Yes    | 905 (46.0)                                                      | 143 (7.3)         | 85 (18.6)             | 79 (27.3)  | 6 (3.6)    | 51 (26.4)           | 3 (2.9)    | 60 (32.1)                                                     | 5 (2.7)           | 2 (10.5)             | 2 (2.2)    | 0         |
|                    | Asthenia          | No     | 696 (35.4)                                                      | 1,373 (69.7)      | 166 (36.6)            | 119 (30.7) | 47 (70.2)  | 86 (33.3)           | 29 (72.5)  | 109 (58.3)                                                    | 162 (86.6)        | 11 (57.9)            | 8 (57.1)   | 3 (60.8)  |
|                    |                   | Yes    | 1,273 (64.7)                                                    | 596 (30.3)        | 289 (63.4)            | 269 (69.3) | 20 (27.5)  | 172 (66.7)          | 11 (27.5)  | 78 (41.7)                                                     | 25 (13.4)         | 8 (42.1)             | 6 (42.9)   | 2 (40.0)  |
|                    | Myalgia           | No     | 980 (49.8)                                                      | 1699 (86.3)       | 288 (63.4)            | 177 (54.1) | 111 (86.7) | 113 (52.1)          | 69 (85.2)  | 127 (67.9)                                                    | 187 (100)         | 19 (100)             | 10 (100)   | 9 (100)   |
|                    |                   | Yes    | 989 (50.2)                                                      | 270 (13.7)        | 167 (36.6)            | 150 (45.9) | 17 (13.3)  | 104 (47.9)          | 12 (14.8)  | 60 (32.1)                                                     | 0                 | 0                    | 0          | 0         |
|                    | Weight loss       | No     | 1,830 (92.9)                                                    | 1,952 (99.1)      | 441 (96.9)            | 63 (84.0)  | 378 (99.5) | 51 (87.9)           | 238 (99.2) | 179 (95.7)                                                    | 187 (100)         | 19 (100)             | 19 (100)   | 19 (100)  |
|                    |                   | Yes    | 139 (7.1)                                                       | 17 (0.9)          | 14 (3.1)              | 12 (16.0)  | 2 (0.5)    | 7 (12.1)            | 2 (0.8)    | 8 (4.3)                                                       | 0                 | 0                    | 0          | 0         |
| GASTRO-ENETERIC    | Lympho-adenopathy | No     | 1,924 (97.7)                                                    | 1,964 (99.8)      | 451 (99.1)            | 14 (77.8)  | 437 (100)  | 11 (73.3)           | 283 (100)  | 186 (99.5)                                                    | 187 (100)         | 19 (100)             | 19 (100)   | 19 (100)  |
|                    |                   | Yes    | 45 (2.3)                                                        | 5 (0.2)           | 4 (0.9)               | 4 (22.2)   | 0          | 4 (26.7)            | 0          | 1 (0.5)                                                       | 0                 | 0                    | 0          | 0         |
|                    | Appetite loss     | No     | 1,705 (86.6)                                                    | 1,951 (99.1)      | 449 (98.7)            | 106 (95.5) | 343 (99.7) | 74 (93.7)           | 218 (99.5) | 178 (95.2)                                                    | 177 (94.7)        | 16 (84.2)            | 1 (50)     | 15 (88.2) |
|                    |                   | Yes    | 264 (13.4)                                                      | 18 (0.9)          | 6 (1.3)               | 5 (4.5)    | 1 (0.3)    | 5 (6.3)             | 1 (0.5)    | 9 (4.8)                                                       | 10 (5.4)          | 3 (15.8)             | 1 (50)     | 2 (11.8)  |
|                    | Abdominal ache    | No     | 1,857 (94.3)                                                    | 1,954 (99.2)      | 444 (97.6)            | 50 (83.3)  | 394 (99.8) | 39 (83)             | 251 (100)  | 178 (95.2)                                                    | 185 (98.9)        | 19 (100)             | 2 (100)    | 17 (100)  |
|                    |                   | Yes    | 112 (5.7)                                                       | 15 (0.8)          | 11 (2.4)              | 10 (16.7)  | 1 (0.2)    | 8 (17)              | 0          | 9 (4.8)                                                       | 2 (1.1)           | 0                    | 0          | 0         |
|                    | Nausea/vomit      | No     | 1,807 (91.8)                                                    | 1,950 (99.0)      | 443 (97.4)            | 56 (84.6)  | 387 (99.5) | 39 (86.7)           | 251 (99.2) | 181 (96.8)                                                    | 185 (98.9)        | 18 (94.7)            | 0          | 18 (94.7) |
|                    |                   | Yes    | 162 (8.2)                                                       | 19 (1.0)          | 12 (2.6)              | 10 (15.2)  | 2 (0.5)    | 6 (13.3)            | 2 (0.8)    | 6 (3.2)                                                       | 2 (1.1)           | 1 (5.3)              | 0          | 1 (5.3)   |
|                    | Diarrhoea         | No     | 1,755 (89.1)                                                    | 1,948 (98.9)      | 445 (97.8)            | 81 (90.0)  | 364 (99.7) | 62 (96.9)           | 233 (99.6) | 174 (93.1)                                                    | 184 (98.4)        | 19 (100)             | 1 (100)    | 18 (100)  |
|                    |                   | Yes    | 214 (10.9)                                                      | 21 (1.1)          | 10 (2.2)              | 9 (10.0)   | 1 (0.3)    | 2 (3.1)             | 1 (0.4)    | 13 (7.0)                                                      | 3 (1.6)           | 0                    | 0          | 0         |
| ENT                | Dysgeusia         | No     | 1,508 (76.6)                                                    | 1,856 (94.3)      | 396 (87.0)            | 147 (73.5) | 249 (97.7) | 107 (74.3)          | 149 (96.8) | 173 (92.5)                                                    | 182 (97.3)        | 17 (89.5)            | 3 (75)     | 14 (93.3) |
|                    |                   | Yes    | 461 (23.4)                                                      | 113 (5.7)         | 59 (13.0)             | 53 (26.5)  | 6 (2.4)    | 37 (25.7)           | 5 (3.3)    | 14 (7.5)                                                      | 5 (2.7)           | 2 (10.5)             | 1 (25)     | 1 (6.7)   |
|                    | Anosmia           | No     | 1,525 (77.5)                                                    | 1,841 (93.5)      | 378 (83.1)            | 121 (62.1) | 257 (98.6) | 85 (60.3)           | 155 (98.7) | 176 (94.1)                                                    | 180 (96.3)        | 18 (94.7)            | 3 (100)    | 15 (93.8) |
|                    |                   | Yes    | 444 (22.6)                                                      | 128 (6.5)         | 77 (16.9)             | 74 (38.0)  | 3 (1.2)    | 56 (39.7)           | 2 (1.3)    | 11 (5.9)                                                      | 7 (3.7)           | 1 (5.3)              | 0          | 1 (6.3)   |
|                    | Rhinorrhoea       | No     | 1,196 (60.7)                                                    | 1,882 (95.6)      | 418 (91.9)            | 156 (83.0) | 262 (98.1) | 99 (86.1)           | 181 (98.9) | 135 (72.2)                                                    | 184 (98.4)        | 18 (94.7)            | 4 (80)     | 14 (100)  |
|                    |                   | Yes    | 773 (39.3)                                                      | 87 (4.4)          | 37 (8.1)              | 32 (17.0)  | 5 (1.9)    | 16 (13.9)           | 2 (1.1)    | 52 (27.8)                                                     | 3 (1.6)           | 2 (5.3)              | 1 (20)     | 0         |
|                    | Rhinitis          | No     | 1,496 (76.0)                                                    | 1,890 (96.0)      | 431 (94.7)            | 89 (84.8)  | 342 (97.7) | 56 (91.8)           | 231 (97.5) | 152 (81.2)                                                    | 173 (92.5)        | 16 (84.2)            | 2 (66.7)   | 14 (87.5) |
|                    |                   | Yes    | 473 (24.0)                                                      | 79 (4.0)          | 24 (5.3)              | 16 (15.2)  | 8 (2.3)    | 5 (8.2)             | 6 (2.5)    | 35 (18.7)                                                     | 14 (5.9)          | 3 (15.8)             | 1 (33.3)   | 2 (12.5)  |
|                    | Sore throat       | No     | 1,251 (63.5)                                                    | 1,931 (98.1)      | 441 (96.9)            | 175 (93.6) | 266 (99.3) | 105 (92.1)          | 182 (98.9) | 127 (67.9)                                                    | 186 (99.5)        | 19 (100)             | 3 (100)    | 16 (84.2) |
|                    |                   | Yes    | 718 (36.5)                                                      | 38 (1.9)          | 14 (3.1)              | 12 (6.4)   | 2 (0.7)    | 9 (7.9)             | 2 (1.1)    | 60 (32.1)                                                     | 1 (0.5)           | 0                    | 0          | 3 (15.8)  |
|                    | Conjunctivitis    | No     | 1,879 (95.4)                                                    | 1,955 (99.3)      | 445 (97.8)            | 27 (73.0)  | 418 (100)  | 15 (68.2)           | 276 (100)  | 183 (97.9)                                                    | 187 (100)         | 19 (100)             | 1 (100)    | 18 (100)  |
|                    |                   | Yes    | 90 (4.6)                                                        | 14 (0.7)          | 10 (2.2)              | 10 (27.0)  | 0          | 7 (31.8)            | 0          | 4 (2.1)                                                       | 0                 | 0                    | 0          | 0         |

|               |                       |     |              |              |            |            |            |            |            |            |            |           |          |           |
|---------------|-----------------------|-----|--------------|--------------|------------|------------|------------|------------|------------|------------|------------|-----------|----------|-----------|
| PULMONARY     | Dyspnoea              | No  | 1,601 (81.3) | 1,769 (89.8) | 328 (72.2) | 88 (44.7)  | 240 (93.0) | 68 (49.6)  | 151 (93.8) | 172 (92.0) | 169 (90.4) | 16 (84.2) | 2 (50)   | 14 (93.3) |
|               |                       | Yes | 368 (18.7)   | 200 (10.2)   | 127 (27.9) | 109 (55.3) | 18 (7.0)   | 69 (5.4)   | 10 (6.2)   | 15 (8.0)   | 18 (9.6)   | 3 (15.8)  | 2 (50)   | 1 (6.7)   |
|               | Cough                 | No  | 1,046 (53.1) | 1,725 (87.6) | 381 (83.8) | 180 (71.7) | 201 (98.5) | 137 (80.6) | 128 (100)  | 125 (66.8) | 185 (98.9) | 18 (94.7) | 5 (83.3) | 13 (100)  |
|               |                       | Yes | 923 (46.9)   | 244 (12.4)   | 74 (16.2)  | 71 (28.3)  | 3 (1.5)    | 33 (19.4)  | 0          | 62 (33.2)  | 2 (1.1)    | 1 (5.3)   | 1 (16.7) | 0         |
|               | Chest pain            | No  | 1,782 (90.5) | 1,931 (98.1) | 429 (94.3) | 70 (75.3)  | 359 (99.2) | 51 (75)    | 229 (99.6) | 177 (94.7) | 175 (93.6) | 15 (79.9) | 2 (50)   | 13 (86.7) |
|               |                       | Yes | 187 (9.5)    | 38 (1.9)     | 26 (5.7)   | 23 (24.7)  | 3 (0.8)    | 17 (25)    | 1 (0.4)    | 10 (5.3)   | 12 (5.0)   | 4 (21.1)  | 2 (50)   | 2 (13.3)  |
| PSYCHOLOGICAL | Insomnia              | No  | 1,771 (89.9) | 1,867 (94.8) | 382 (84.0) | 49 (46.7)  | 333 (95.1) | 36 (46.7)  | 210 (95.0) | 176 (94.1) | 182 (97.3) | 17 (89.5) | 3 (75)   | 14 (93.3) |
|               |                       | Yes | 198 (10.1)   | 102 (5.2)    | 73 (16.0)  | 56 (53.3)  | 17 (4.9)   | 41 (53.2)  | 11 (5.0)   | 11 (5.9)   | 5 (2.7)    | 2 (10.5)  | 1 (25)   | 1 (6.7)   |
|               | Anxiety               | No  | 1,781 (90.5) | 1,885 (95.7) | 391 (86.0) | 58 (52.3)  | 333 (96.4) | 44 (57.1)  | 214 (96.8) | 180 (96.3) | 184 (98.4) | 19 (100)  | 3 (100)  | 16 (100)  |
|               |                       | Yes | 188 (9.5)    | 84 (4.3)     | 64 (14.0)  | 53 (47.3)  | 11 (3.2)   | 33 (42.9)  | 7 (3.2)    | 7 (3.7)    | 3 (1.6)    | 0         | 0        | 0         |
|               | Depression            | No  | 1,893 (96.1) | 1,932 (98.1) | 430 (94.5) | 28 (63.6)  | 523 (97.8) | 23 (63.9)  | 256 (97.7) | 183 (97.9) | 187 (100)  | 19 (100)  | 0        | 19 (100)  |
|               |                       | Yes | 76 (3.9)     | 38 (1.9)     | 25 (5.5)   | 16 (36.4)  | 9 (2.2)    | 13 (36.1)  | 6 (2.3)    | 4 (2.1)    | 0          | 0         | 0        | 0         |
| NEUROLOGICAL  | Confusion             | No  | 1,912 (97.1) | 1,942 (98.6) | 439 (96.5) | 22 (75.9)  | 417 (97.8) | 18 (78.3)  | 269 (97.8) | 185 (98.9) | 187 (100)  | 19 (100)  | 0        | 19 (100)  |
|               |                       | Yes | 57 (2.9)     | 27 (1.4)     | 16 (3.5)   | 7 (24.1)   | 9 (2.1)    | 5 (21.7)   | 6 (2.2)    | 2 (1.1)    | 0          | 0         | 0        | 0         |
|               | Aphasia               | No  | 1,953 (99.2) | 1,965 (99.8) | 453 (99.6) | 4 (80.0)   | 449 (99.8) | 2 (66.7)   | 294 (99.7) | 187 (100)  | 179 (95.7) | 17 (89.5) | 0        | 17 (89.5) |
|               |                       | Yes | 16 (0.8)     | 4 (0.2)      | 2 (0.4)    | 1 (20.0)   | 1 (0.2)    | 1 (33.3)   | 1 (0.3)    | 0          | 8 (4.3)    | 2 (1.5)   | 0        | 2 (10.5)  |
|               | Memory loss           | No  | 1,892 (96.1) | 1,897 (96.3) | 401 (88.2) | 26 (44.8)  | 375 (94.5) | 19 (44.2)  | 240 (94.1) | 180 (96.3) | 170 (90.9) | 13 (58.4) | 1 (100)  | 12 (66.7) |
|               |                       | Yes | 77 (3.9)     | 72 (3.7)     | 54 (11.8)  | 32 (55.2)  | 22 (5.5)   | 24 (55.8)  | 15 (5.9)   | 7 (3.7)    | 17 (9.1)   | 6 (31.6)  | 0        | 6 (33.3)  |
|               | Concentration deficit | No  | 1,740 (88.4) | 1,809 (91.9) | 351 (77.2) | 52 (39.1)  | 299 (92.9) | 35 (37.6)  | 192 (93.7) | 173 (92.5) | 185 (98.9) | 19 (100)  | 4 (100)  | 15 (100)  |
|               |                       | Yes | 229 (11.6)   | 160 (8.1)    | 104 (22.8) | 81 (60.9)  | 23 (7.1)   | 58 (62.4)  | 13 (6.3)   | 14 (7.5)   | 2 (1.1)    | 0         | 0        | 0         |
|               | Dizziness             | No  | 1,883 (95.6) | 1,947 (98.9) | 435 (95.6) | 34 (68.0)  | 401 (99.0) | 26 (66.7)  | 256 (98.8) | 181 (96.8) | 187 (100)  | 19 (100)  | 0        | 19 (100)  |
|               |                       | Yes | 86 (4.4)     | 22 (1.1)     | 20 (4.4)   | 16 (32.0)  | 4 (1.0)    | 13 (33.3)  | 3 (1.2)    | 6 (3.2)    | 0          | 0         | 0        | 0         |
|               | Convulsions           | No  | 1,968 (100)  | 1,968 (99.9) | 454 (99.8) | 0          | 454 (99.8) | 0          | 297 (99.7) | 187 (100)  | 186 (99.5) | 19 (100)  | 0        | 19 (100)  |
|               |                       | Yes | 1            | 1 (0.1)      | 1 (0.2)    | 0          | 1 (0.2)    | 0          | 1 (0.3)    | 0          | 1 (0.5)    | 0         | 0        | 0         |
|               | Walking disability    | No  | 1,940 (98.5) | 1,963 (99.7) | 451 (99.1) | 18 (94.7)  | 433 (99.3) | 14 (93.3)  | 281 (99.3) | 185 (98.9) | 187 (100)  | 19 (100)  | 1 (100)  | 18 (100)  |
|               |                       | Yes | 29 (1.5)     | 6 (0.3)      | 4 (0.9)    | 1 (5.3)    | 3 (0.7)    | 1 (6.7)    | 2 (0.7)    | 2 (1.1)    | 0          | 0         | 0        | 0         |
|               | Fainting              | No  | 1,949 (99)   | 1,966 (99.9) | 452 (99.3) | 12 (100)   | 440 (99.3) | 10 (100)   | 286 (99.3) | 187 (100)  | 187 (100)  | 19 (100)  | 0        | 19 (100)  |
|               |                       | Yes | 20 (1)       | 3 (0.1)      | 3 (0.7)    | 0          | 3 (0.7)    | 0          | 2 (0.7)    | 0          | 0          | 0         | 0        | 0         |
| OTHER         | Haemorrhage           | No  | 1,964 (99.7) | 1,968 (99.9) | 454 (99.8) | 2 (66.7)   | 452 (100)  | 2 (100)    | 296 (100)  | 187 (100)  | 186 (99.5) | 19 (100)  | 0        | 19 (100)  |
|               |                       | Yes | 5 (0.3)      | 1 (0.1)      | 1 (0.2)    | 1 (33.3)   | 0          | 0          | 0          | 0          | 1 (0.5)    | 0         | 0        | 0         |
|               | Skin lesions          | No  | 1,943 (98.7) | 1,960 (99.5) | 452 (99.3) | 7 (70.0)   | 445 (100)  | 6 (66.7)   | 289 (100)  | 185 (98.9) | 186 (99.5) | 19 (100)  | 0        | 19 (100)  |
|               |                       | Yes | 26 (1.3)     | 9 (0.5)      | 3 (0.7)    | 3 (30.0)   | 0          | 3 (33.3)   | 0          | 2 (1.1)    | 1 (0.5)    | 0         | 0        | 0         |
|               | Other                 | No  | NA           | 1,935 (98.3) | 431 (94.7) | NA         | 431 (94.7) | NA         | 279 (93.6) | NA         | 187 (100)  | 19 (100)  | NA       | 19 (100)  |
|               |                       | Yes | NA           | 34 (1.7)     | 24 (5.3)   | NA         | 24 (5.3)   | NA         | 19 (6.4)   | NA         | 0          | 0         | NA       | 0         |
